# Supplementary material for: Conserved chromosomal clustering of genes governed by chromatin regulators in Drosophila
Source: Springer Nature journal article supplement (doi:10.1186/gb-2008-9-9-r134), 2008-09-10
Supplement: Additional file 2 [file gb-2008-9-9-r134-s2.pdf]

| Chromosome | Clusters | Length  | Avg. Length | Misexpressed genes | Avg. Misexpressed genes | Genes | Avg. Genes |
|------------|----------|---------|-------------|--------------------|-------------------------|-------|------------|
| 2L         | 1        | 12,609  | 12,609      | 3                  | 3.0                     | 4     | 4.0        |
| 2R         | 4        | 62,892  | 15,723      | 15                 | 3.7                     | 30    | 7.5        |
| 3L         | 15       | 227,525 | 15,168      | 62                 | 4.1                     | 96    | 6.4        |
| 3R         | 4        | 45,137  | 11,284      | 14                 | 3.5                     | 22    | 5.5        |
| X          | 1        | 24,804  | 24,804      | 3                  | 3.0                     | 10    | 10.0       |
| TOTAL      | 25       | 372,967 | 15,918      | 97                 | 3.5                     | 162   | 6.7        |
