# Supplementary material for: Conserved chromosomal clustering of genes governed by chromatin regulators in Drosophila
Source: Springer Nature journal article supplement (doi:10.1186/gb-2008-9-9-r134), 2008-09-10
Supplement: Additional file 20 [file gb-2008-9-9-r134-s20.pdf]

|                | Common Clusters (1) |      | Common Clusters (2) |      |
|----------------|---------------------|------|---------------------|------|
| Trithorax-ASH2 | 6                   | 75%  | 4                   | 50%  |
| Trithorax-NURF | 4                   | 57%  | 2                   | 29%  |
| Trithorax-dMyc | 6                   | 100% | 6                   | 100% |
| Trithorax-ASH1 | 4                   | 50%  | 2                   | 25%  |
|                |                     | 71%  |                     | 57%  |

Common clusters (1): cluster overlap considering genes affected in the same or the opposite way in the mutants analyzed. Common clusters (2): cluster overlap only considering genes affected in the same way in the mutants analyzed.
